# Supplementary material for: Predictors of misperceptions, risk perceptions, and personal risk perceptions about COVID-19 by country, education and income
Source: HighWire-hosted journal article supplement (doi:10.1136/jim-2021-001835), 2021-08-11
Supplement: jim-2021-001835supp001_data_supplement.pdf [file jim-2021-001835supp001_data_supplement.pdf]

| Predictor Variable                             | OR (95% CI)          | P-value |
|------------------------------------------------|----------------------|---------|
| <b>Misperception about COVID-19</b>            |                      |         |
| Education (no college vs. college)             | 0.744 (0.613, 0.905) | 0.003*  |
| Country (Canada vs. USA)                       | 0.907 (0.725, 1.136) | 0.397   |
| Country (UK vs. USA)                           | 0.986 (0.787,1.234)  | 0.397   |
| Income (1st vs. 2nd income quartile)           | 1.055 (0.830, 1.341) | 0.660   |
| Income (1st vs. 3rd income quartile)           | 0.660 (0.494, 0.882) | 0.005*  |
| Income (1st vs. 4th income quartile)           | 0.613 (0.454, 0.826) | 0.001*  |
| <b>Risk Perception about COVID-19</b>          |                      |         |
| Education (no college vs. college)             | 1.212 (0.999, 1.470) | 0.052   |
| Country (Canada vs. USA)                       | 1.017 (0.818, 1.264) | 0.882   |
| Country (UK vs. USA)                           | 1.504 (1.204, 1.879) | <0.001* |
| Income (1st vs. 2nd income quartile)           | 0.886 (0.697, 1.126) | 0.321   |
| Income (1st vs. 3rd income quartile)           | 1.005 (0.757, 1.333) | 0.975   |
| Income (1st vs. 4th income quartile)           | 1.050 (0.786, 1.403) | 0.743   |
| <b>Personal Risk Perception about COVID-19</b> |                      |         |
| Education (no college vs. college)             | 0.736 (0.497, 1.091) | 0.127   |
| Country (Canada vs. USA)                       | 0.403 (0.234, 0.692) | 0.001*  |
| Country (UK vs. USA)                           | 0.770 (0.503, 1.178) | 0.228   |
| Income (1st vs. 2nd income quartile)           | 0.540 (0.342, 0.855) | 0.009*  |
| Income (1st vs. 3rd income quartile)           | 0.655 (0.376, 1.141) | 0.135   |
| Income (1st vs. 4th income quartile)           | 0.383 (0.196, 0.749) | 0.005*  |

| Country                                        | Predictor Variable                   | OR (95% CI)          | P-value |
|------------------------------------------------|--------------------------------------|----------------------|---------|
| <b>Personal Risk Perception about COVID-19</b> |                                      |                      |         |
| <b>USA</b>                                     | Education (no college vs. college)   | 0.839 (0.461, 1.529) | 0.567   |
|                                                | Income (1st vs. 2nd income quartile) | 0.506 (0.258, 0.992) | 0.047*  |
|                                                | Income (1st vs. 3rd income quartile) | 0.445 (0.191, 1.035) | 0.060   |
|                                                | Income (1st vs. 4th income quartile) | 0.205 (0.074, 0.568) | 0.002*  |

| Country                             | Predictor Variable                   | OR (95% CI)          | P-value |
|-------------------------------------|--------------------------------------|----------------------|---------|
| <b>Misperception about COVID-19</b> |                                      |                      |         |
| <b>United Kingdom</b>               | Education (no college vs. college)   | 0.639 (0.461, 0.886) | 0.007*  |
|                                     | Income (1st vs. 2nd income quartile) | 0.870 (0.610, 1.239) | 0.440   |
|                                     | Income (1st vs. 3rd income quartile) | 0.586 (0.354, 0.968) | 0.037*  |
|                                     | Income (1st vs. 4th income quartile) | 0.414 (0.190, 0.900) | 0.026*  |
